# Supplementary material for: The effect of interspecific variation in photosynthetic plasticity on 4-year growth rate and 8-year survival of understorey tree seedlings in response to gap formations in a cool-temperate deciduous forest
Source: Oxford University Press journal article supplement (doi:10.1093/treephys/tpx042), 2017-03-31
Supplement: tpx042_RSupplementOguchietal.doc [file tpx042_RSupplementOguchietal.doc]

Supplementary Data

**Figure S1** A map of the study site located in the Tomakomai Experimental Forest (TOEF), Hokkaido University, Hokkaido, Japan [42°41′ N, 141°36′ E, 65 m elevation].

**Figure S2** The change in the fraction of open area in the canopy (canopy openness) at the control (closed squares) and gap (open circles) plots after the gap formation, which were conducted on 19 July 2002. The canopy openness was evaluated from the hemispherical photographs, which were taken above the seedlings. Bars denote ± standard error of the mean. **P* < 0.05, ***P* < 0.01, ****P* < 0.001. During September 2004, a large typhoon hit the northern Japan, which caused an increase in light intensity, particularly at the control plots in 2005 (grey square). (Although simultaneous measurements of irradiance at plants and above the forest canopy are more accurate for calculating the relative irradiance compared to the hemispherical photographs, the former method requires two persons for the measurements and highly time-consuming. Therefore for each seedling, we used the hemispherical photographs to estimate the relative irradiance.)

**Figure S3** The change in total branch length per height of seedlings after the gap formation. Naturally growing seedlings of six temperate deciduous tree species at the control (closed squares) and gap (open circles) sites were used. Bars denote ± standard error of the mean. **P* < 0.05, ***P* < 0.01, ****P* < 0.001. *Kalopanax pictus (K.* *pictus), Magnolia obovata (M.* *obovata), Acer mono (A.* *mono), Quercus crispula (Q.* *crispula), Acer japonicum (A.* *japonicum), Fraxinus lanuginosa (F.* *lanuginosa)*

**Figure S4** The change in annual solar radiation (open squares) and sum of solar radiation of growing season (from May to Oct: closed circles), which was obtained at a flux tower in the Tomakomai Experimental Forest from 2000 to 2008.


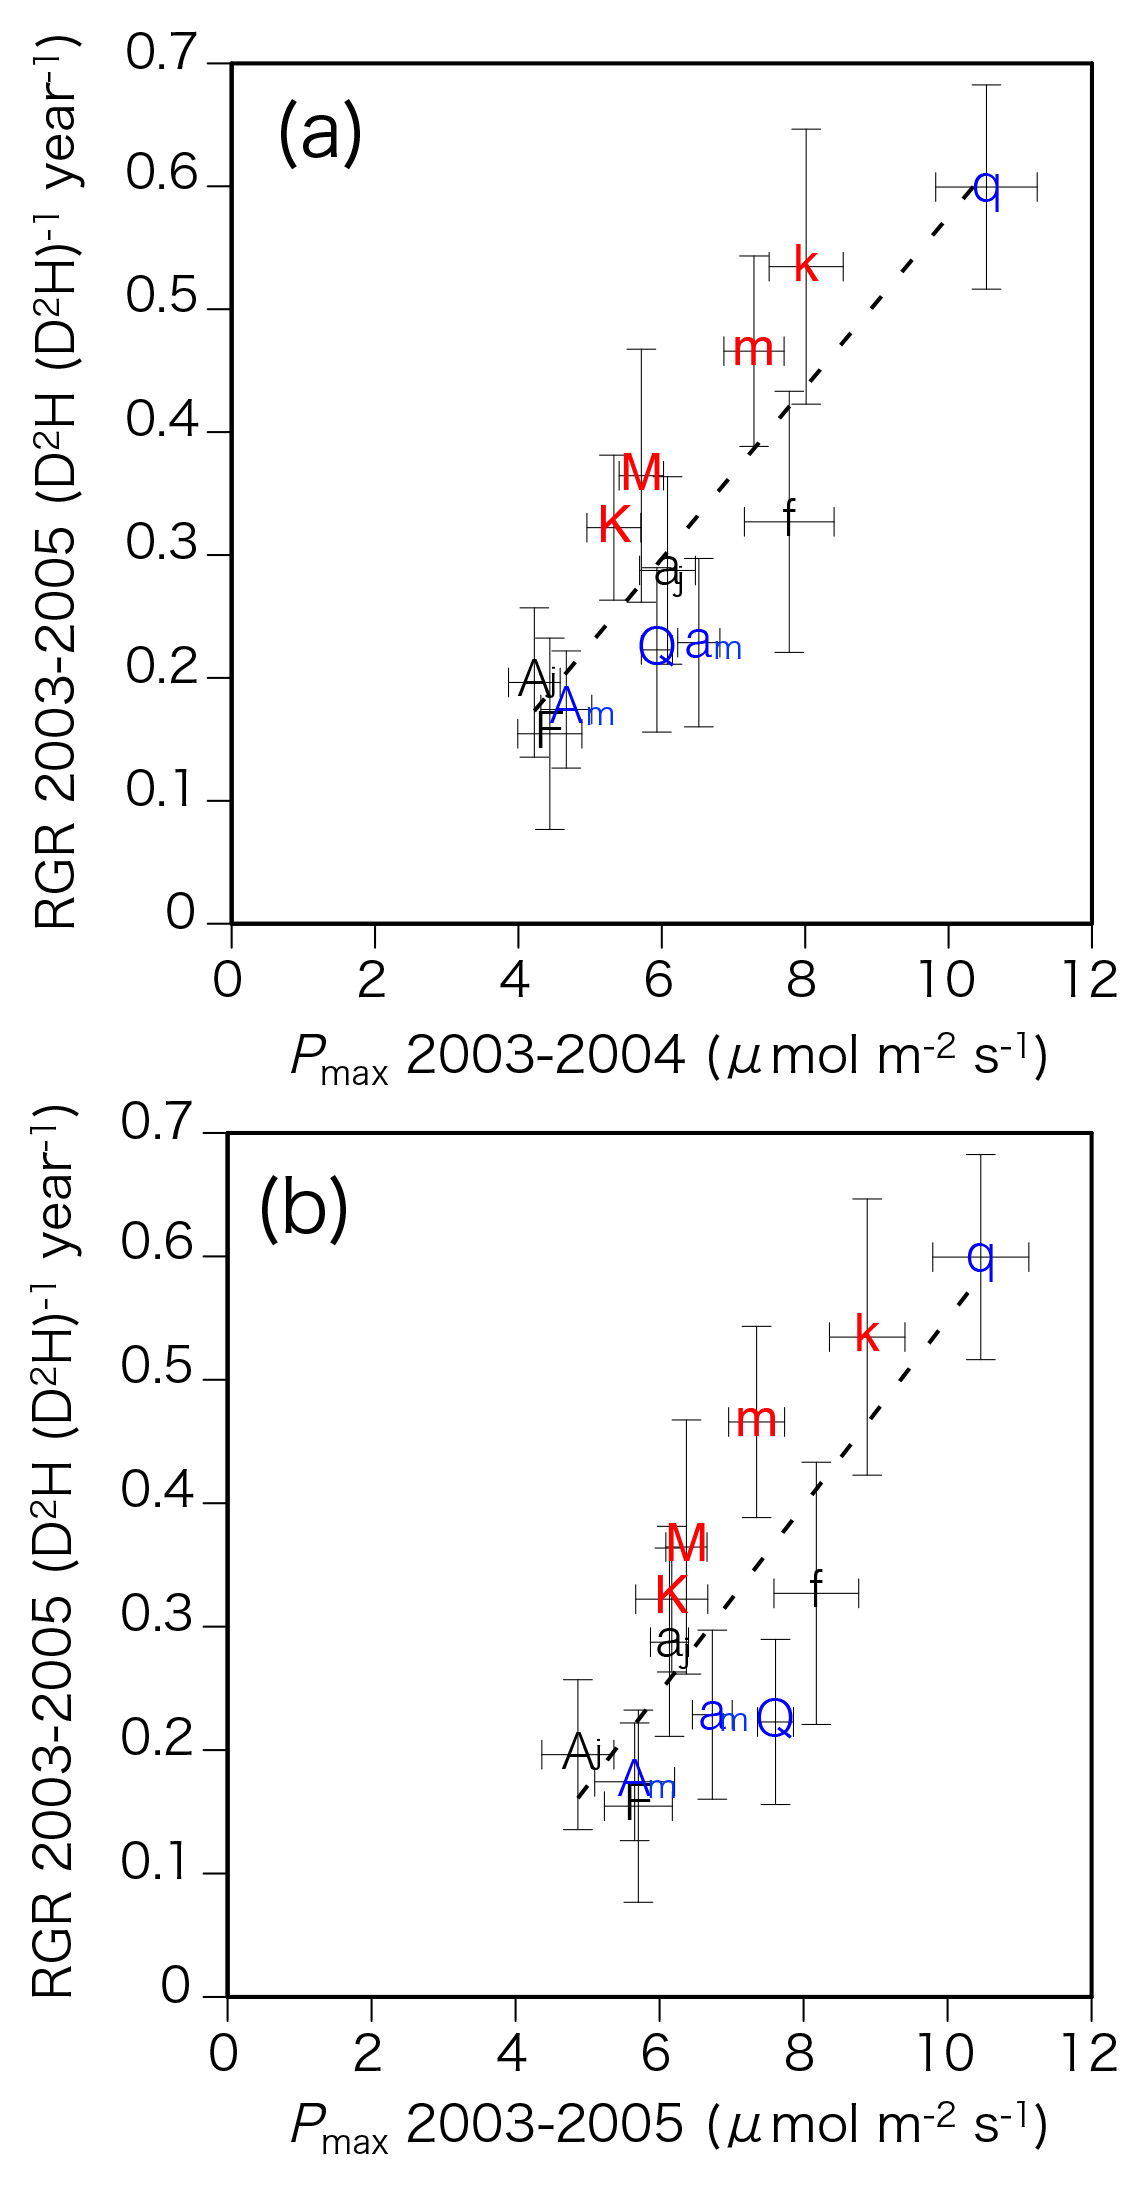


**Figure S5** Relationship between the average of light-saturated photosynthetic rate (*P*max) from 2003 to 2004 and relative growth rate (RGR) from 2002 to 2005 (a), and relationship between the average of *P*max from 2003 to 2005 and RGR from 2003 to 2005 (b), among six tree species grown at control plots (capital letter symbols) and gap plots (small letter symbols). We should note that the *P*max in control plots in 2005 was affected by an infrequent unexpected event: the increase of light intensity caused by a strike of large typhoon in autumn 2004. Error bars denote the standard error. The initials, M, K, F, Aj, Q and Am indicate *Magnolia obovata*, *Kalopanax pictus*, *Fraxinus lanuginosa*, *Acer japonicum*, *Quercus crispula* and *Acer mono* respectively. Red symbols, black symbols and blue symbols indicate fast-growing canopy tree species, sub-canopy tree species and dominant canopy tree species, respectively.
